# Supplementary material for: Endogenous Opioid-Masked Latent Pain Sensitization: Studies from Mouse to Human
Source: PLoS One. 2015 Aug 25;10(8):e0134441. doi: 10.1371/journal.pone.0134441 (PMC4549112; doi:10.1371/journal.pone.0134441)
Supplement: S1 Table — Table with individual dose-response data on primary and secondary hyperalgesia assessed by monofilaments (von Frey hair) before and after a MHI (Excel-file). (XLSX) [file pone.0134441.s003.xlsx]

## Sheet: Pharm-40 sec @52 degrees (2)
Von Frey															Von Frey
Primary Hyperalgesia															Secondary Hyperalgesia
MTI-10.0 mg/kg Naloxone HCl, i.p.															MTI-10.0 mg/kg Naloxone HCl, i.p.
			Left															Left
von Frey															von Frey
Subject #	9.0	10.1	11.1	17.0	19.0	20.0	23.0	24.0		X	SEM	SD			Subject #	9.0	10.1	11.1	17.0	19.0	20.0	23.0	24.0		X	SEM	SD
Date	2/8/13	2/8/13	2/8/13	2/18/13	2/18/13	2/18/13	2/18/13	2/18/13							Date	2/8/13	2/8/13	2/8/13	2/18/13	2/18/13	2/18/13	2/18/13	2/18/13
Testing Day (1, X2, X3)	x2	x2	x2	1	1	1	1	1							Testing Day (1, X2, X3)	x2	x2	x2	1	1	1	1	1
Pre-MTI Baseline	3.468	2.559	3.468	3.468	3.468	3.468	3.468	4.275		3.24075	0.22725	0.4545			Pre-MTI Baseline	3.17	3.17	1.767	1.448	.755	1.054	1.288	.95		2.38875	0.455731	0.911462
120 minutes post-MTI	0.554	0.124	0.343	0.157	.08	.343	.157	.245		0.2945	0.099024	0.198048			120 minutes post-MTI	0.064	0.01	0.066	0.064	.046	.112	.003	.027		0.051	0.0136748	0.0273496
Pre-Pharm Baseline	3.468	3.17	3.468	3.468	3.468	2.559	2.559	1.767		2.99088	0.224148	0.633987			Pre-Pharm Baseline	1.288	1.288	0.95	3.468	1.288	0.755	3.468	1.288		1.72413	0.386871	1.09424
30 minutes post-injection	0.95	0.429	0.95	0.343	0.112	0.245	0.554	0.05		0.454125	0.12239	0.346171			30 minutes post-injection	0.554	0.019	0.429	0.112	0	0.022	0.157	0.01		0.162875	0.0752222	0.21276
60 minutes post-injection	1.039	0.343	1.039	0.245	0.027	0.175	0.343	0.064		0.409375	0.143248	0.405165			60 minutes post-injection	0.157	0	0.245	0.01	0	0.027	0.064	0.064		0.070875	0.0309114	0.0874307
120 minutes post-injection	1.447	1.039	1.288	0.95	0.95	1.288	1.039	1.039		1.13	0.0654735	0.185187			120 minutes post-injection	0.417	0.201	0.554	0.157	0.343	0.245	0.343	0.245		0.313125	0.0456745	0.129187
180 minutes post-injection	1.767	2.126	3.17	2.559	1.767	2.559	2.559	2.559		2.38325	0.167344	0.473322			180 minutes post-injection	0.95	1.072	1.072	1.039	1.072	1.039	1.288	1.288		1.1025	0.0428727	0.121262
MTI-3.0 mg/kg Naloxone HCl, i.p.															MTI-3.0 mg/kg Naloxone HCl, i.p.
			Left															Left
von Frey															von Frey
Subject #	9.2	10.1	11.1	12.0	10.0	10.3	11.2	21.0		X	SEM	SD			Subject #	9.2	10.1	11.1	12.0	10.0	10.3	11.2	21.0		X	SEM	SD
Date	2/1/13	2/1/13	2/1/13	2/1/13	2/8/13	2/8/13	2/8/13	2/18/13							Date	2/1/13	2/1/13	2/1/13	2/1/13	2/8/13	2/8/13	2/8/13	2/18/13
Testing Day (1, X2, X3)	1	1	1	1	x2	x2	x2	1							Testing Day (1, X2, X3)	1	1	1	1	x2	x2	x2	1
Pre-MTI Baseline	2.126	2.559	3.468	3.468	3.468	1.288	2.126	3.468		2.74638	0.299245	0.846393			Pre-MTI Baseline	1.288	3.17	1.767	2.559	2.559	1.072	2.559	1.288		2.03275	0.274744	0.777094
120 minutes post-MTI	0.022	0.124	0.343	0.222	0.05	0.124	0.245	0.429		0.194875	0.0501649	0.141888			120 minutes post-MTI	0.007	0.01	0.066	0.157	0	0	0.004	0.245		0.061125	0.0325425	0.0920441
Pre-Pharm Baseline	2.559	4.275	3.468	1.767	3.007	3.468	3.468	3.468		3.185	0.265341	0.750499			Pre-Pharm Baseline	1.072	1.288	1.767	1.288	0.755	1.072	1.447	3.468		1.51963	0.297469	0.84137
30 minutes post-injection	1.288	0.755	1.769	3.468	0.95	1.072	0.429	0.584		1.28937	0.344918	0.975575			30 minutes post-injection	1.288	0.112	0.595	0.554	0.245	0.157	0.064	0.584		0.449875	0.142876	0.404114
60 minutes post-injection	1.767	1.072	2.559	3.007	0.95	1.072	0.429	0.429		1.41063	0.33708	0.953405			60 minutes post-injection	0.429	0.429	0.245	0.343	0.112	0.157	0.05	1.767		0.4415	0.195866	0.553993
120 minutes post-injection	1.288	0.755	3.468	3.17	1.288	1.288	1.447	1.767		1.80888	0.344929	0.975606			120 minutes post-injection	1.072	1.072	1.288	1.288	0.175	0.343	0.175	1.039		0.8065	0.172748	0.488604
180 minutes post-injection	3.17	1.767	3.468	2.126	1.767	2.559	2.559	3.17		2.57325	0.231968	0.656105			180 minutes post-injection	0.95	1.039	2.559	1.288	0.584	1.072	1.769	1.288		1.31862	0.213718	0.604485
MTI-0.3 mg/kg Naloxone HCl, i.p.															MTI-0.3 mg/kg Naloxone HCl, i.p.
			Left															Left
von Frey															von Frey
Subject #	10.0	10.3	11.2	9.1	10.2	11.0	14.0	15.0	22.0	X	SEM	SD			Subject #	10.0	10.3	11.2	9.1	10.2	11.0	14.0	15.0	22.0	X	SEM	SD
Date	2/1/13	2/1/13	2/1/13	2/8/13	2/8/13	2/8/13	2/18/13	2/18/13	2/18/13						Date	2/1/13	2/1/13	2/1/13	2/8/13	2/8/13	2/8/13	2/18/13	2/18/13	2/18/13
Testing Day (1, X2, X3)	1	1	1	x2	x2	x2	1	1	1						Testing Day (1, X2, X3)	1	1	1	x2	x2	x2	1	1	1
Pre-MTI Baseline	3.468	1.288	2.126	x2.559	3.468	3.468	3.468	3.468	3.468	3.02775	0.298891	0.845391			Pre-MTI Baseline	2.559	1.072	2.559	x1.79	3.468	3.17	1.288	1.288	3.468	2.4145	0.496146	0.992292
120 minutes post-MTI	0.05	0.124	0.245	0.066	0.112	0.036	0.755	0.429	0.417	0.248222	0.0807537	0.242261			120 minutes post-MTI	0	0	0.004	.007	.036	.05	.026	.112	.064	0.00133333	0.00133333	0.0023094
Pre-Pharm Baseline	3.17	1.769	1.767	x4.275	3.468	3.468	3.468	3.468	3.468	3.00575	0.272535	0.770844			Pre-Pharm Baseline	2.126	0.554	1.288	x1.288	3.17	1.769	0.95	1.288	3.468	1.82662	0.367423	1.03923
30 minutes post-injection	1.769	1.447	0.755		2.559	3.468	2.559	3.007	1.767	2.16638	0.314418	0.889307			30 minutes post-injection	0.245	0.584	0.755		0.429	0.343	1.072	1.769	3.007	1.0255	0.332206	0.939619
60 minutes post-injection	0.429	0.584	0.95		1.767	2.559	3.17	1.767	1.769	1.62437	0.335148	0.947942			60 minutes post-injection	0.755	0.112	0.321		0.755	0.343	1.769	1.039	2.559	0.956625	0.293063	0.828906
120 minutes post-injection	3.17	1.767	3.007		3.007	3.468	3.17	2.559	2.559	2.83838	0.187902	0.531466			120 minutes post-injection	0.95	0.584	1.251		1.767	0.584	0.95	1.072	2.559	1.21462	0.234123	0.662199
180 minutes post-injection	2.559	1.072	1.767		2.559	3.468	3.468	2.559	3.468	2.615	0.307414	0.869498			180 minutes post-injection	1.288	0.554	0.95		2.559	0.755	0.95	1.767	3.17	1.49913	0.329544	0.93209
MTI-0.03 mg/kg Naloxone HCl, i.p.															MTI-0.03 mg/kg Naloxone HCl, i.p.
			Left															Left
von Frey															von Frey
Subject #	9.1	10.2	11.0	9.3	13.0	25.0				X	SEM	SD			Subject #	9.1	10.2	11.0	9.3	13.0	25.0				X	SEM	SD
Date	2/1/13	2/1/13	2/1/13	2/8/13	2/8/13	2/18/13									Date	2/1/13	2/1/13	2/1/13	2/8/13	2/8/13	2/18/13
Testing Day (1, X2, X3)	1	1	1	x2	x2	1									Testing Day (1, X2, X3)	1	1	1	x2	x2	1
Pre-MTI Baseline	2.559	3.468	3.468	3.468	3.468	3.468				3.2862	0.1818	0.406517			Pre-MTI Baseline	1.79	3.468	3.17	4.275	3.468	1.288				3.17767	0.731899	1.26769
120 minutes post-MTI	0.066	0.112	0.036	0.157	0.112	.05				0.0966	0.020894	0.0467204			120 minutes post-MTI	.007	.036	.05	0.157	0.01	.047				0.0835	0.0735	0.103945
Pre-Pharm Baseline (PID7)	3.468	3.468	3.468	3.468	3.468	2.559				3.3165	0.1515	0.371098			Pre-Pharm Baseline (PID7)	0.584	3.468	1.072	2.559	1.072	1.447				1.70033	0.445793	1.09196
30 minutes post-injection	1.039	3.468	3.007	3.007	3.468	1.288				2.54617	0.446424	1.09351			30 minutes post-injection	0.245	3.468	1.447	1.288	3.17	0.343				1.66017	0.561825	1.37619
60 minutes post-injection	2.559	3.468	0.554	3.468	2.559	1.769				2.39617	0.452313	1.10793			60 minutes post-injection	1.072	2.559	0.584	1.251	3.468	0.595				1.58817	0.477882	1.17057
120 minutes post-injection	4.275	3.468	3.468	2.559	3.468	1.769				3.16783	0.357003	0.874475			120 minutes post-injection	0.95	3.468	1.447	1.288	1.767	1.769				1.7815	0.360161	0.88221
180 minutes post-injection	3.468	3.468	3.468	3.468	2.53	2.559				3.16017	0.194727	0.476982			180 minutes post-injection	1.072	3.468	0.95	2.559	0.95	1.767				1.79433	0.421671	1.03288
MTI-Saline															MTI-Saline
			Left															Left
von Frey															von Frey
Subject #	9.0	9.3	13.0	9.2	12.0	18.0	16.0			X	SEM	SD			Subject #	9.0	9.3	13.0	9.2	12.0	18.0	16.0			X	SEM	SD
Date	2/1/13	2/1/13	2/1/13	2/8/13	2/813	2/18/13	2/18/13								Date	2/1/13	2/1/13	2/1/13	2/8/13	2/813	2/18/13	2/18/13
Testing Day (1, X2, X3)	1	1	1	x2	x2	1	1								Testing Day (1, X2, X3)	1	1	1	x2	x2	1	1
Pre-MTI Baseline	3.468	3.468	3.468	2.126	3.468	3.468	3.468			3.27629	0.191714	0.507228			Pre-MTI Baseline	3.17	4.275	3.468	1.288	2.559	3.468	1.251			2.952	0.499372	1.11663
120 minutes post-MTI	0.554	0.157	0.112	0.022	0.222	0.417	0.429			0.273286	0.0738421	0.195368			120 minutes post-MTI	0.064	0.157	0.01	0.007	0.157	.124	.047			0.079	0.0334201	0.0747295
Pre-Pharm Baseline	3.468	3.468	3.468	3.468	3.468	3.468	1.288			3.15657	0.311429	0.823963			Pre-Pharm Baseline	1.288	1.072	1.767	1.288	1.072	3.468	1.288			1.60614	0.32244	0.853097
30 minutes post-injection	3.468	0.755	1.447	3.468	3.468	4.275	1.767			2.664	0.499155	1.32064			30 minutes post-injection	1.288	1.288	1.769	1.767	3.468	1.767	0.95			1.75671	0.30934	0.818437
60 minutes post-injection	3.468	1.288	3.007	3.468	2.559	4.275	2.559			2.94629	0.357352	0.945466			60 minutes post-injection	0.95	1.072	3.17	1.288	3.468	1.767	0.95			1.80929	0.405226	1.07213
120 minutes post-injection	3.468	1.288	0.95	3.468	3.468	3.468	3.17			2.75429	0.425827	1.12663			120 minutes post-injection	1.288	0.95	0.755	1.767	1.767	3.17	1.288			1.56929	0.30258	0.800551
180 minutes post-injection	3.468	1.767	3.17	3.468	2.53	3.468	3.17			3.00586	0.24181	0.639768			180 minutes post-injection	1.288	1.072	0.95	1.288	0.95	3.468	1.767			1.54043	0.338447	0.895446
This was done in January/February 2013
